1           A gut-restricted lithocholic acid analog as an  
2           inhibitor of gut bacterial bile salt hydrolases

3   Arijit A. Adhikari,<sup>1</sup> Deepti Ramachandran,<sup>2</sup> Snehal N. Chaudhari,<sup>1</sup> Chelsea E. Powell,<sup>1</sup> Megan D.  
4                                          McCurry,<sup>1</sup> Alexander S. Banks,<sup>2</sup> A. Sloan Devlin<sup>1,\*</sup>

5   <sup>1</sup>Department of Biological Chemistry and Molecular Pharmacology, Harvard Medical School,  
6   Boston, Massachusetts 02115, United States

7   <sup>2</sup>Division of Endocrinology, Metabolism, and Diabetes, Beth Israel Deaconess Medical Center,  
8   Boston, Massachusetts 02115, United States

9

10 \*Correspondence: [sloan\\_devlin@hms.harvard.edu](mailto:sloan_devlin@hms.harvard.edu)

11

12

13

14 **Abstract**

15 Bile acids play crucial roles in host physiology by acting as both detergents that aid in digestion  
16 and as signaling molecules that bind to host receptors. Gut bacterial bile salt hydrolase (BSH)  
17 enzymes perform the gateway reaction leading to the conversion of host-produced primary bile  
18 acids into bacterially modified secondary bile acids. Small molecule probes that target BSHs will  
19 help elucidate the causal roles of these metabolites in host physiology. We previously reported the  
20 development of a covalent BSH inhibitor with low gut permeability. Here, we build on our  
21 previous findings and describe the development of a second-generation gut-restricted BSH  
22 inhibitor with enhanced potency, reduced off-target effects, and durable in vivo efficacy. SAR  
23 studies focused on the bile acid core identified a compound, **AAA-10**, containing a C3-sulfonated  
24 lithocholic acid scaffold and an alpha-fluoromethyl ketone warhead as a potent pan-BSH inhibitor.  
25 This compound inhibits BSH activity in conventional mouse fecal slurries, bacterial cultures, and  
26 purified BSH proteins and displays reduced toxicity against mammalian cells compared to first  
27 generation compounds. Oral administration of **AAA-10** to wild-type mice for 5 days resulted in a  
28 decrease in the abundance of the secondary bile acids deoxycholic acid (DCA) and lithocholic acid  
29 (LCA) in the mouse GI tract with low systemic exposure of **AAA-10**, demonstrating that **AAA-10**  
30 is an effective tool for inhibiting BSH activity and modulating bile acid pool composition in vivo.

31

32 Metabolites derived from the human gut microbiota have been implicated as causal agents in the  
33 maintenance of host health and the progression of disease.<sup>1</sup> Advances in metabolomics, sequencing  
34 technologies, and the development of genetic tools have facilitated the identification of bacterial  
35 metabolites and the biosynthetic pathways responsible for their production. However, the lack of  
36 specific tools to control the levels of these metabolites in complex microbial communities has  
37 hindered our ability to interrogate the roles of these metabolites in host physiology. Encouragingly,  
38 the recent development of small molecule modulators of bacterial metabolites has revealed the  
39 potential of microbiota-targeted therapies to treat disease, including colon cancer, cardiovascular  
40 disease, and Parkinson's disease.<sup>2-4</sup>

41 Bile acids are one large class of molecules that undergo substantial metabolism by gut  
42 bacteria.<sup>5</sup> While bile acids have long been studied for their detergent properties,<sup>6,7</sup> recent findings  
43 have illustrated the key role that these metabolites play as signaling molecules. Specific bile acids  
44 act as ligands for host nuclear hormone receptors (NHRs) and G-protein-coupled receptors  
45 (GPCRs), thereby affecting host metabolic and immunomodulatory processes.<sup>8-11</sup> Disruption of  
46 bile acid homeostasis has been implicated in the initiation and progression of disease, including  
47 cancer, obesity, and hypercholesterolemia,<sup>8,12-15</sup> underscoring the need for tools that control the  
48 levels of these metabolites in vivo.

49 Host-produced primary bile acids are conjugated to taurine or glycine in the mammalian  
50 liver, stored in the gallbladder, and secreted into the small intestine post-prandially where they act  
51 as detergents that facilitate digestion. In the lower GI tract, resident bacteria chemically modify  
52 these metabolites, producing a large class of molecules called secondary bile acids. Before these  
53 modifications can occur, the C24 amide of conjugated bile acids must be hydrolyzed, a gateway  
54 reaction that is carried out exclusively by gut bacterial bile salt hydrolases (BSHs) (EC 3.5.1.24)

55 (Figure 1A).<sup>16</sup> BSHs are widespread in human gut bacteria and have been identified in members  
56 of 12 different phyla, including Bacteroidetes and Firmicutes, the two dominant phyla in the  
57 human gut.<sup>17</sup> Recent studies have found that BSH abundance or activity are correlated with human  
58 diseases, including inflammatory bowel diseases, type 2 diabetes, and cardiovascular disease.<sup>17-19</sup>  
59 The causal role of BSH activity in host physiology, however, remains unclear. For example,  
60 studies involving antibiotic-treated and germ-free mice colonized with BSH-containing or BSH-  
61 deficient bacteria<sup>20,21</sup> or conventional mice treated with non-selective small molecules<sup>22,23</sup> have  
62 reported conflicting results about the effects of BSH activity on host metabolism. An inhibitor that  
63 targets a wide array of BSHs but exhibits limited off-target effects against bacterial and host cells  
64 would allow for the selective *in vivo* modulation of bile acid composition, shifting the bile acid  
65 pool toward conjugated bile acids and decreasing the abundance of deconjugated and secondary  
66 bile acids. Such a tool could be utilized in fully colonized animals and would provide valuable  
67 information about how bile acids affect host physiology.

68 In prior work, we took advantage of the nucleophilicity of the highly conserved active site  
69 N-terminal cysteine residue (Cys2) in BSHs to develop first-in-class covalent pan-BSH inhibitors  
70 (Figure 1B).<sup>24</sup> In this study, we screened electrophilic warheads appended to the core of  
71 chenodeoxycholic acid (CDCA), an abundant human bile acid that is recognized by a broad  
72 spectrum of BSHs.<sup>20,25,26</sup> This work established an alpha-fluoromethylketone (FMK)-containing  
73 molecule, compound **7** (referred to here as **AAA-1, 1**), as a potent and selective pan-BSH inhibitor.  
74 Treatment of conventional mice with a single dose of **AAA-1** allowed us to inhibit BSH activity  
75 and shift the *in vivo* bile acid pool toward host-produced bile acids for one day. We also showed  
76 that appending a sulfonate<sup>27</sup> to the C3 hydroxyl group resulted in gut-restriction of the inhibitor, a  
77 change that limited the systemic exposure of this compound (GR-7, referred to here as **AAA-2, 2**).

78 These studies demonstrated the potential of alpha-fluoromethyl ketone-containing inhibitors to  
 79 target BSHs in vivo.

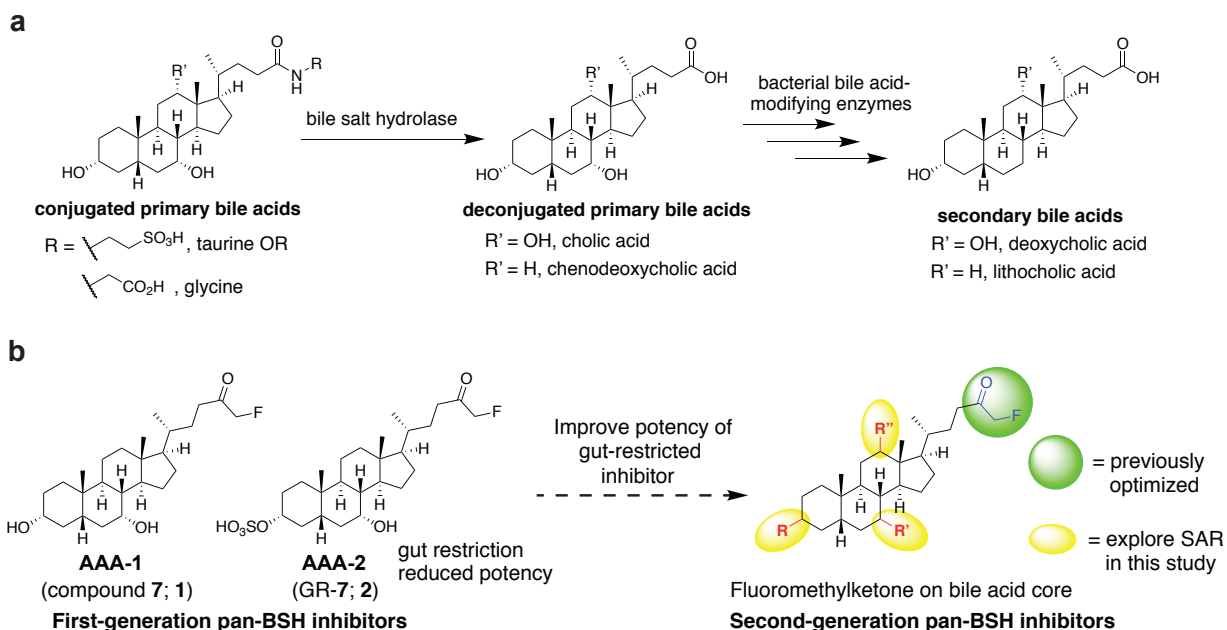

80  
 81

82 **Figure 1. Targeting gut bacterial BSHs.** **a**, Bacterial bile salt hydrolases (BSHs) perform the  
 83 gateway reaction leading from host-produced conjugated primary bile acids to bacterially  
 84 modified secondary bile acids. **b**, Development of second-generation BSH inhibitors starting  
 85 from previously reported covalent pan-BSH inhibitors. Sulfonation of **AAA-1** at the C3-OH  
 86 position previously resulted in an inhibitor with low systemic exposure but decreased potency  
 87 (**AAA-2**). Here, SAR studies focusing on the bile acid core were performed with the goal of  
 88 yielding a second-generation pan-BSH inhibitor with improved potency.

89

90 To increase the utility of BSH inhibitors for use in vivo as well as to overcome several  
 91 limitations in our prior study, we sought to develop second-generation inhibitors. The gut-  
 92 restricted inhibitor **AAA-2** exhibited lower potency than **AAA-1**, motivating the synthesis of new  
 93 lead compounds. Moreover, while we previously demonstrated proof-of-principle that a gut-  
 94 restricted inhibitor could affect BSH activity in vivo, we did not demonstrate a shift in the in vivo  
 95 bile acid pool in our prior work. Finally, to demonstrate the potential utility of these compounds  
 96 in animal models, we sought to show that a gut-restricted inhibitor could shift the bile acid pool  
 97 over a multi-day period. Here, we have built on our previous findings and report the development

98 of a second-generation gut-restricted BSH inhibitor with enhanced potency, reduced off-target  
99 effects, and multi-day in vivo efficacy. Our structure-activity relationship (SAR) studies focused  
100 on the bile acid core, and we identified a lithocholic acid core-based inhibitor, **AAA-10 (8)** (Figure  
101 2), as a potent pan-BSH inhibitor through screening against conventional mouse fecal slurries,  
102 bacterial cultures, and recombinant proteins. This compound is not antibacterial, displays reduced  
103 toxicity against mammalian cells compared to **AAA-1** and **AAA-2**, and does not affect signaling  
104 through the farnesoid X receptor (FXR) or Takeda G-protein receptor 5 (TGR5), key bile acid-  
105 mediated receptors. Finally, we demonstrate that **AAA-10 (8)** can modulate the in vivo bile acid  
106 pool for 5 days, resulting in the decreased abundance of the secondary bile acids deoxycholic acid  
107 (DCA) and lithocholic acid (LCA).

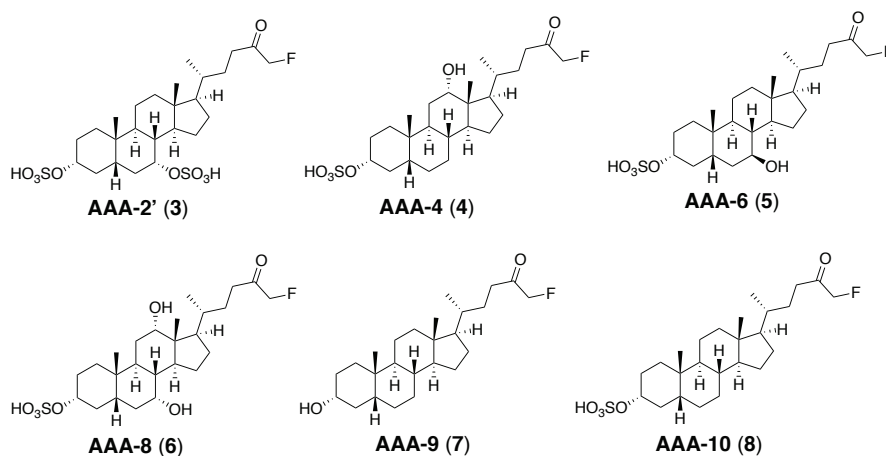

108

109 **Figure 2. Library of sulfonated inhibitors.** A small library of inhibitors was generated with  
110 SAR focused on incorporating the cores of naturally occurring bile acids found in both mouse  
111 and humans while maintaining an α-fluoromethyl ketone electrophile.

112

## 113 RESULTS AND DISCUSSION

### 114 Synthesis of BSH inhibitor candidates

115 In prior work, sulfonation of **AAA-1 (1)** at C3, a position that is exposed to solvent in the  
116 co-crystal structure of this compound with the BSH from the gut bacterium *Bacteroides*  
117 *thetaiotaomicron (B. theta)*, increased the solubility of this compound and limited its systemic  
118 exposure.<sup>24,28</sup> The resultant compound **AAA-2, (2)**, however, was less potent than **AAA-1**.<sup>24</sup> With  
119 the goal of improving potency while still maintaining gut restriction, we decided to append the  
120 optimized FMK warhead on naturally occurring bile acid cores found in both the murine and  
121 human gut (CDCA, DCA, ursodeoxycholic acid (UDCA), cholic acid (CA), and LCA). These  
122 compounds could then be sulfonated at the C3 position to produce second-generation inhibitor  
123 candidates (Figure 1B).

124 In order to expedite the synthesis of the library, an optimized protecting group-free  
125 synthesis was developed (Scheme S1).<sup>29</sup> Following activation of the unprotected bile acid with  
126 CDI, addition of magnesium benzyl fluoromalonate provided the fluoro beta-ketoester. Removal  
127 of the benzyl group followed by decarboxylation under hydrogenation conditions provided the  
128 FMK compounds. Finally, the sulfonate group was installed using SO<sub>3</sub>.pyridine. Because the C3-  
129  $\alpha$ -OH group on the bile acid core is more sterically accessible than the C7 and C12  $\alpha$ -alcohols,  
130 the sulfonation reactions proceeded selectively to provide the candidate C3-sulfonated inhibitors  
131 (Figure 2, **3-6, 8**).

132

### 133 **Library screen in conventional mouse feces**

134 We previously reported the use of a wild-type conventional mouse fecal slurry assay<sup>23</sup> to  
135 identify pan-inhibitors of BSHs.<sup>24</sup> Because fecal slurry should contain BSHs from nearly all  
136 bacteria in the distal region of the murine GI tract, demonstrating inhibition of BSH activity in this  
137 assay represents an important benchmark that all inhibitor candidates should meet. We therefore

138 utilized this assay as the first screen in the process of developing second-generation BSH  
139 inhibitors. Inhibitor candidates were added to fresh feces obtained from conventional wild-type  
140 mice (C57Bl/6J) and suspended in buffer under reducing conditions (Figure 3A). To facilitate  
141 identification of an inhibitor with enhanced potency compared to AAA-2, the first-generation gut-  
142 restricted inhibitor, compounds were intentionally tested at 10  $\mu$ M, a concentration at which  
143 neither AAA-1 nor AAA-2 completely inhibits enzyme activity.<sup>24</sup> After 30 min, glycine-  
144 conjugated deuterated chenodeoxycholic acid (GCDCA-*d*4) was added and its conversion to the  
145 deconjugated product CDCA-*d*4 was quantified using ultra-high performance liquid  
146 chromatography-mass spectrometry (UPLC-MS).

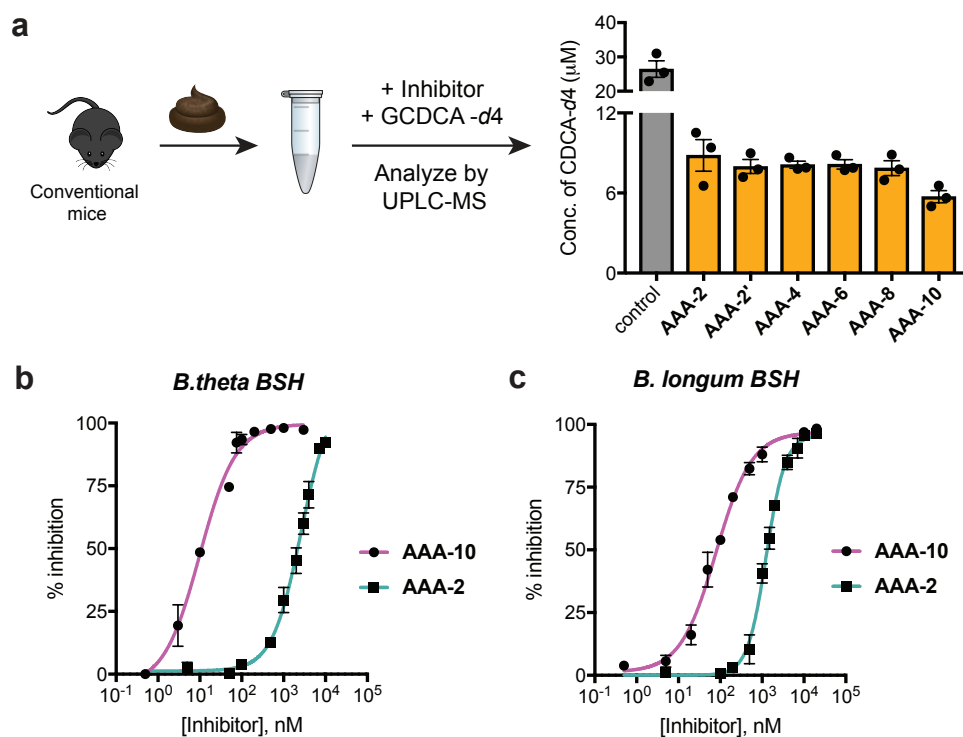

147

148 **Figure 3. Identification of AAA-10 as a second-generation pan-BSH inhibitor.** **a**, Assay  
149 design for screening the inhibitor library. Screening in fresh mouse feces identified AAA-10 as a  
150 potent second-generation pan-inhibitor of BSHs. Inhibitors were tested at a concentration of 10  
151  $\mu$ M. Assays were performed three times independently in biological triplicate with similar  
152 results. **b** and **c**, AAA-10 is more potent than AAA-2 against recombinant BSHs. Comparison of  
153 AAA-10 and AAA-2 dose-response curves against *Bacteroides thetaiotaomicron* (*B. theta*) and



154 *Bacteroides adolescentis* (*B. adolescentis*) BSHs using tauro-ursodeoxycholic acid (TUDCA)  
155 and tauro-deoxycholic acid (TDCA) as the respective substrates. See Table S1 for comparison of  
156 IC<sub>50</sub> values of **AAA-1**, **AAA-2** and **AAA-10**. For **b** and **c**, Graphpad was used to fit IC<sub>50</sub> curves.  
157 All assays were performed in biological triplicate, and data are presented as mean ± s.e.m.

158 Mono-sulfonated inhibitor candidates containing DCA, UDCA, and CA cores (**AAA-4** (**4**),  
159 **AAA-6** (**5**), and **AAA-8** (**6**), respectively) inhibited BSH activity but were not more potent than  
160 **AAA-2** in this assay (Figure 3A). The C3, C7-disulfonated derivative **AAA-2'** (**3**) was also  
161 equipotent to **AAA-2**. Notably, the LCA core-based analog **AAA-10** was more potent than both  
162 **AAA-2** and the inhibitor candidates **AAA-2'**, **AAA-4**, **AAA-6**, and **AAA-8**. **AAA-10** was  
163 equipotent to its unsulfonated analog **AAA-9** (**7**), indicating that C3-sulfonation did not hinder  
164 BSH inhibitory activity (Figure S1A).

165 Mice fed a high-fat diet (HFD) possess higher levels of bile acids, including conjugated  
166 bile acids, than mice fed a chow diet.<sup>30</sup> Because increased substrate concentration may increase in  
167 vivo BSH activity, we also evaluated the ability of **AAA-10** to inhibit the enzyme activity in feces  
168 obtained from HFD-fed mice. We found that **AAA-10** inhibited BSH activity in this assay as  
169 effectively as **AAA-1**, our most potent first-generation BSH inhibitor (Figure S1B). Together, our  
170 data suggest that **AAA-10** is a potent inhibitor of BSHs found in the murine gut.

171

## 172 **AAA-10 inhibits recombinant BSHs and is more potent than AAA-2**

173 To further characterize the potency of **AAA-10** compared to **AAA-1** and **AAA-2**, we  
174 determined the IC<sub>50</sub> values of both **AAA-10** and **AAA-2** against purified recombinant *B. theta*  
175 (Gram-negative) and *B. longum* (Gram-positive) BSHs and compared these values to the IC<sub>50</sub>  
176 values for **AAA-1** which had been determined in our previous work<sup>24</sup> (Figure 3B-C). The IC<sub>50</sub>  
177 values were evaluated using a conjugated bile acid substrate for which the enzymes demonstrated  
178 the best hydrolytic efficiency (TUDCA and TDCA, respectively).<sup>24</sup> **AAA-10** exhibited an IC<sub>50</sub>

179 value of 10 nM against *B. theta* rBSH and 80 nM against *B. longum* rBSH, demonstrating that  
180 **AAA-10** was ~250 fold more potent than **AAA-2** against *B. theta* rBSH and ~15 fold more potent  
181 against *B. longum* rBSH (Table S1). Compared to **AAA-1**, **AAA-10** was ~40 fold more potent  
182 against *B. theta* rBSH and equally potent against *B. longum* rBSH (Table S1). The increased  
183 potency of **AAA-10** against *B. theta* rBSH, a selective BSH, compared to both first-generation  
184 inhibitors highlights the potential of this compound to target BSHs which might otherwise be  
185 difficult to inhibit. These data demonstrate that we have developed a second-generation sulfonated  
186 inhibitor with increased potency compared to first-generation compounds.

187

### 188 **AAA-10 inhibits BSH activity in bacterial cultures**

189       Next, we evaluated the ability of **AAA-10** to inhibit enzyme activity in growing cultures  
190 of BSH-containing bacteria using three Gram-negative and three Gram-positive strains found in  
191 the human gut (Figure 4A). Each bacterial culture was diluted to pre-log phase and co-incubated  
192 with 100  $\mu$ M of **AAA-10** and 100  $\mu$ M of an equimolar mixture of taurine-conjugated bile acids  
193 that are abundant in the murine gallbladder and small intestine (tauro-betamuricholic acid  
194 (T $\beta$ MCA), taurocholic acid (TCA), TUDCA, and TDCA).<sup>31</sup> Bacteria were then allowed to grow  
195 into stationary phase over 24 h. Because bacteria vary in their ability to metabolize different  
196 conjugated bile acids, this approach provides an unbiased way of testing the inhibitory activity of  
197 **AAA-10**. After 24 h, percent deconjugation was determined by quantifying bile acid  
198 concentrations in bacterial cultures by UPLC-MS. **AAA-10** exhibited near-complete inhibition of  
199 enzyme activity in all six bacterial cultures (<7% deconjugation) (Figure 4A, Figure S2). **AAA-10**  
200 displayed equivalent inhibitory activity to **AAA-1**, except in the case of *C. perfringens*, where

201 AAA-10 inhibited deconjugation to a greater extent than AAA-1 (4% vs 22% deconjugation,  
202 respectively).<sup>24</sup>

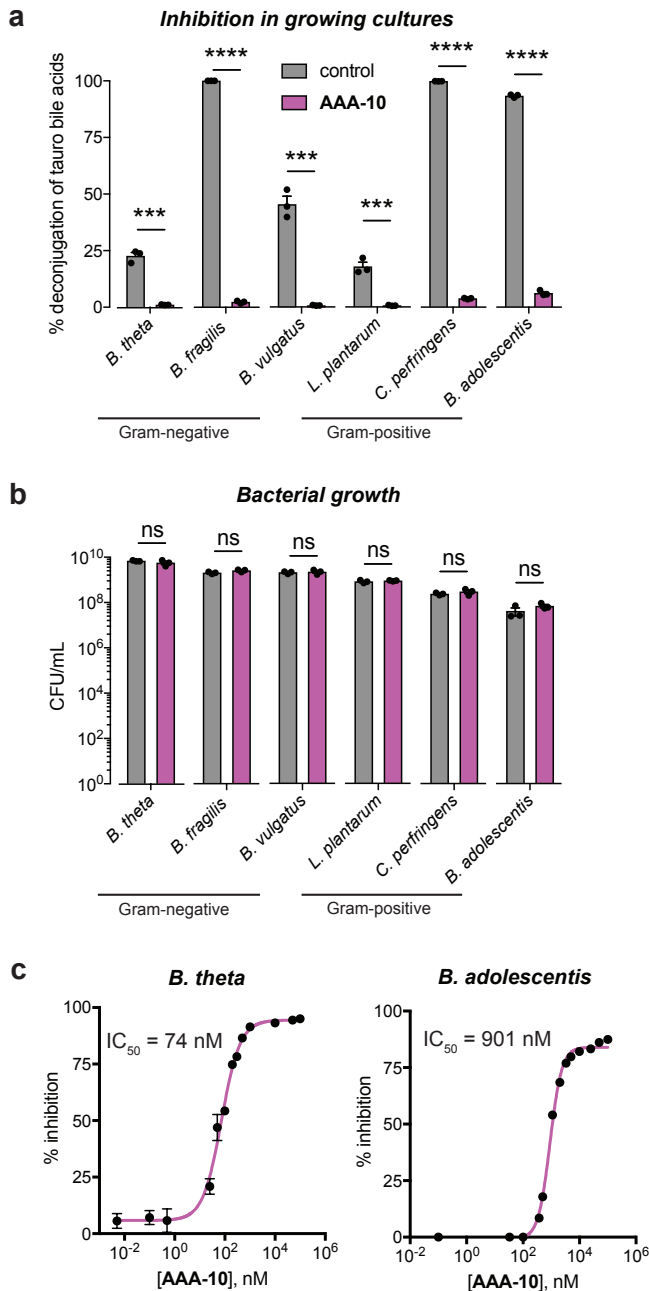

203

204 **Figure 4. AAA-10 inhibits BSH activity in bacterial cultures without exhibiting**  
205 **antibacterial effects. a, AAA-10 inhibits bacterial BSH activity. The BSH inhibitory activity of**  
206 **AAA-10 against three Gram-negative (*B. theta* VPI-5482, *Bacteroides fragilis* ATCC 25285, and**  
207 ***Bacteroides vulgatus* ATCC 8482) and three Gram-positive (*Lactobacillus plantarum* WCFS1,**

208 *Clostridium perfringens* ATCC 13124, and *Bifidobacterium adolescentis* L2–32) human gut  
209 bacteria was evaluated. BSH activity was quantified as percent deconjugation of tauro-  
210 conjugated bile acids at 24 h as determined by UPLC–MS (for absolute concentrations of  
211 substrates and products recovered, see Figure S2). **b**, **AAA-10** did not affect bacterial cell  
212 viability. At the end of the assay in (a), the bacteria were plated to determine cell viability. **c**,  
213 **AAA-10** is a nanomolar inhibitor of bacterial BSHs. Dose-response curves of **AAA-10** against *B.*  
214 *theta* and *B. adolescentis* cultures were generated using tauro-ursodeoxycholic acid (TUDCA)  
215 and tauro-deoxycholic acid (TDCA) as substrates, respectively. For **a**, and **b**, two-tailed  
216 Student’s t-test were performed. For **c**, Graphpad was used to fit IC<sub>50</sub> curves. \*p<0.05, \*\*p<0.01,  
217 \*\*\*p<0.001, \*\*\*\*p<0.0001, ns = not significant. All assays were performed in biological  
218 triplicate, and data are presented as mean ± s.e.m.  
219

220 To demonstrate that the BSH inhibitory activity of **AAA-10** in bacterial cultures was not  
221 due to growth inhibition, we evaluated the colony forming units in aforementioned bacterial  
222 cultures treated with **AAA-10**. We found that this compound did not significantly affect the growth  
223 of any of the tested bacterial strains at a concentration of 100 μM (Figure 4B).

224 We also determined the IC<sub>50</sub> values of **AAA-10** against *B. theta* (Gram-negative) and *B.*  
225 *adolescentis* (Gram-positive) whole cell cultures. For this purpose, we used a single conjugated  
226 bile acid against which the enzyme demonstrated the highest deconjugation efficiency (TUDCA  
227 and TDCA, respectively). While the IC<sub>50</sub> value for **AAA-10** against *B. adolescentis* was higher  
228 than the previously reported value for **AAA-1** (901 nM versus 108 nM, respectively), **AAA-10**  
229 displayed a lower IC<sub>50</sub> value against *B. theta* than **AAA-1** (74 nM versus 427 nM, respectively)<sup>24</sup>  
230 (Figure 4c). These data are consistent with our results using purified protein and show that **AAA-**  
231 **10** is the most potent inhibitor of the *B. theta* BSH yet developed. Together, these results  
232 demonstrate that **AAA-10** is a nanomolar inhibitor of gut bacterial BSHs that does not display anti-  
233 bacterial properties.

234

235 **AAA-10 displays limited off-target effects on mammalian cells**

236 At high in vivo concentrations, bile acids have been shown to disrupt cell membranes and  
237 can induce apoptosis in mammalian cells<sup>15,32,33</sup>. Because **AAA-10** is based on a bile acid scaffold,  
238 we evaluated the toxicity of **AAA-10** on intestinal cells as well as its off-target effects on host bile  
239 acid receptors. Human intestinal Caco-2 cells were differentiated in transwell inserts to form a  
240 polarized monolayer with tight junctions<sup>34</sup> (Figure S3A). Incubation of these cells with **AAA-1**,  
241 **AAA-2** or **AAA-10** showed that while **AAA-1** and **AAA-2** (100  $\mu$ M) negatively affected the cell  
242 viability, **AAA-10** did not have an effect on the cell viability at this concentration (Figure 5A).  
243 **AAA-10** also had no effect on the viability of human liver cells (Hep-G2) at 100  $\mu$ M or 500  $\mu$ M  
244 concentrations (Figure S3B). We next determined whether BSH inhibitors affected intercellular  
245 tight junctions by measuring the passive diffusion of FITC-dextran (4 kDa) from the apical to the  
246 basolateral chamber of the transwells containing differentiated Caco-2 cells treated apically with  
247 our compounds. **AAA-10** did not appear to damage epithelial integrity at 100  $\mu$ M or 500  $\mu$ M  
248 concentrations, while **AAA-1**, **AAA-2**, and **AAA-9** increased FITC-d permeability by over 85%  
249 (~1.5-3 fold) at a concentration of 100  $\mu$ M (Figure 5B). In order to test the gut-restricted properties  
250 of **AAA-10**, we also quantified the amount of inhibitor in the apical and basolateral chambers in  
251 these transwell assays. We have previously shown that bile acids, including LCA, pass through  
252 Caco-2 monolayers.<sup>35</sup> In contrast, while we were able to detect **AAA-10** in the apical chamber, no  
253 inhibitor was detected in the basolateral chamber 16 h after apical application, indicating that  
254 **AAA-10** does not pass through an epithelial monolayer (Figure 5C-D).

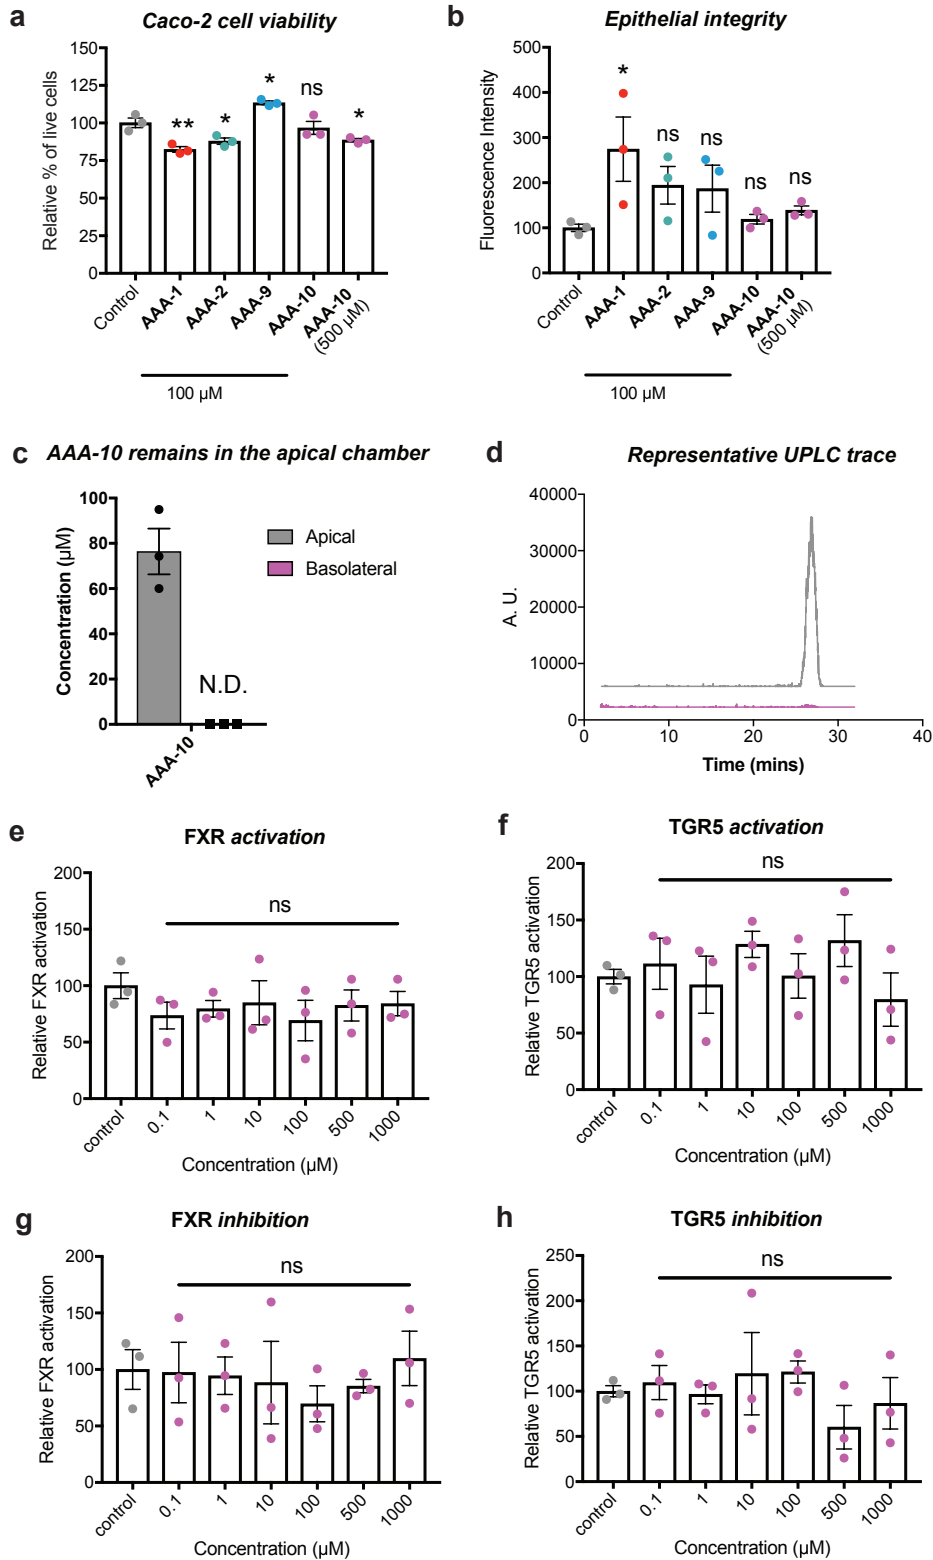

255

256 **Figure 5. AAA-10 is not toxic to mammalian cells and not a ligand for FXR or TGR5. a,**  
 257 Incubation of differentiated Caco-2 cells with AAA-10 (100  $\mu$ M) did not result in toxicity, while

258 incubation with an equivalent concentration of **AAA-1** and **AAA-2** resulted in decreased cell  
259 viability. **b**, **AAA-10** did not damage epithelial tight junctions at 100  $\mu$ M or 500  $\mu$ M, while  
260 treatment with **AAA-1** resulted in loss of epithelial integrity. Epithelial junction integrity was  
261 determined by measuring the transport of 4 kDa FITC-dextran from the apical to the basolateral  
262 chamber. **c**, **AAA-10** did not pass through an epithelial monolayer in an in vitro transwell assay  
263 (for assay setup see Figure S3A). Passage of the molecule from apical chamber to basolateral  
264 chamber was quantified by UPLC-MS. **d**, Representative UPLC-MS extracted ion chromatogram  
265 (EIC) traces of apical and basolateral chamber showing that no **AAA-10** was detected in the  
266 basolateral chamber. **e** and **f**, FXR and TGR5 agonist activity was measured by incubating Caco-  
267 2 cells with varying concentrations of **AAA-10** overnight. **g** and **h**, FXR and TGR5 antagonist  
268 activity was measured by incubating Caco-2 cells with varying concentrations of **AAA-10**  
269 overnight in the presence of 10  $\mu$ M of the FXR agonist chenodeoxycholic acid (CDCA) or 10  
270  $\mu$ M of the TGR5 agonist lithocholic acid (LCA), respectively. For **a-b** and **e-h**, one-way  
271 ANOVA followed by Dunnett's multiple comparisons test. \* $p$ <0.05, \*\* $p$ <0.01, \*\*\* $p$ <0.001,  
272 \*\*\*\* $p$ <0.0001, ns = not significant. All assays were performed in biological triplicate, and data  
273 are presented as mean  $\pm$  s.e.m.

274

275 Bile acids can signal through the host receptors FXR and TGR5, thereby affecting host  
276 metabolism and immune function.<sup>36</sup> Incubation of Caco-2 cells with increasing concentrations of  
277 **AAA-10** revealed that this compound did not act as an agonist of FXR or TGR5 (Figures 5E-F).  
278 Incubation of Caco-2 cells with either GW4062 (FXR agonist) or LCA (TGR5 agonist) followed  
279 by treatment with increasing concentrations of **AAA-10** revealed that this compound did not  
280 antagonize FXR or TGR5 (Figures 5G-H). Collectively, these data suggest that **AAA-10** is a potent  
281 pan-BSH inhibitor with low epithelial permeability that exhibits reduced off-target effects on host  
282 cells compared to the first-generation inhibitors **AAA-1** and **AAA-2**.

283

#### 284 **AAA-10 reduces secondary bile acid abundance in vivo**

285 We next evaluated the ability of **AAA-10** to inhibit BSH activity and modulate bile acid  
286 levels in vivo. Wild-type C57Bl/6J mice were gavaged once daily with **AAA-10** at a dose of 30  
287 mg/kg for 5 days (Figure 6A). The inhibitor was administered at 6 pm to coincide with the start  
288 of the dark photoperiod when mice exhibit increased food consumption.<sup>37</sup> Fecal BSH activity

289 was significantly decreased on days 2 and 6 in **AAA-10**-treated mice compared to vehicle-treated  
290 mice (Figure 6B and Figure S4A), indicating that we were able to achieve durable BSH  
291 inhibition in vivo using **AAA-10**. Analysis of the cecal bile acid pool after sacrifice revealed that  
292 the abundances of DCA and LCA were significantly lowered in the **AAA-10**-treated group  
293 (Figures 6C). DCA and LCA are secondary bile acids that are produced exclusively by gut  
294 bacteria.<sup>5</sup> Cecal **AAA-10** concentration was also negatively correlated with cecal concentrations  
295 of both DCA and LCA (Figures S4B-C). In addition, the abundances of DCA and LCA were  
296 decreased in feces each day starting on day 2 and overall in feces throughout the course of the  
297 study in **AAA-10**-treated mice compared to vehicle-treated mice (Figures 6D-E and Figure S4D).  
298 Together, these findings indicate that **AAA-10** treatment resulted in a sustained reduction in  
299 secondary bile acids in vivo over the period of study.

300 Finally, to evaluate the gut permeability of **AAA-10**, we quantified the levels of this  
301 compound in cecal contents and plasma at sacrifice and in feces over the course of the  
302 experiment (Figures S4E-G). We observed a mean value of 276 picomol/mg wet mass (~276  
303  $\mu\text{M}$ ) of **AAA-10** in cecal contents and a range of 66-2087 picomol/mg (~66-2087  $\mu\text{M}$ ) in feces.  
304 In contrast, five of the six mice exhibited undetectable levels of **AAA-10** in plasma (Figure  
305 S4G). In a separate experiment in which mice were sacrificed 4 hours after the final gavage, we  
306 detected mean **AAA-10** concentrations of 128 picomol/mg wet mass (~128  $\mu\text{M}$ ) in cecal  
307 contents and 12 nM in plasma (Figures S4H-I). Together, these data indicate that **AAA-10**  
308 displays high colonic exposure and low gut permeability.



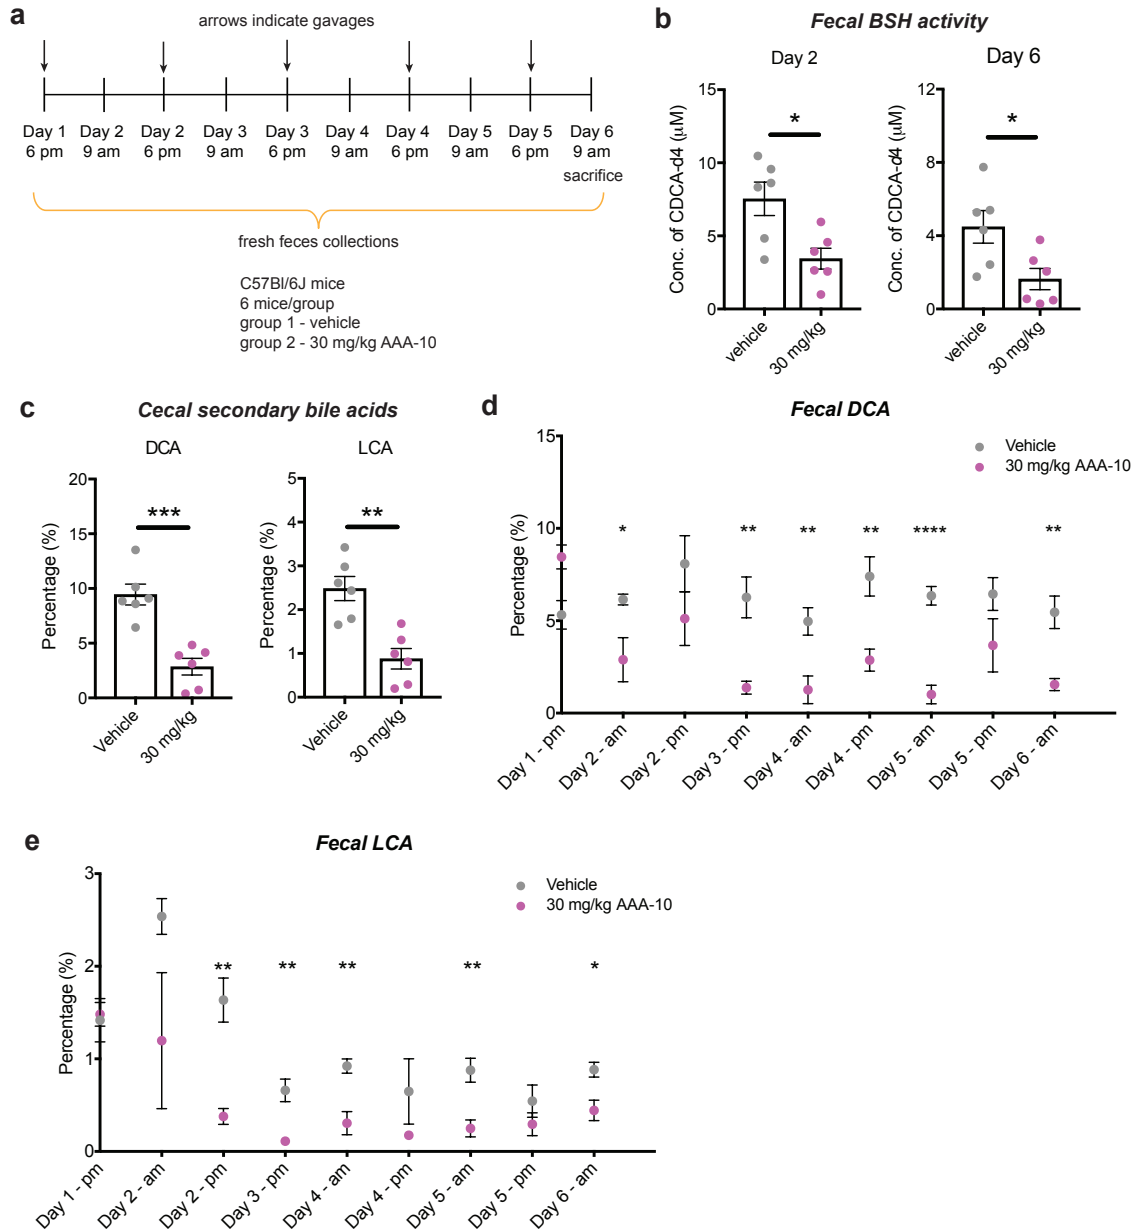

309

**310 Figure 6. AAA-10 inhibits BSH activity in vivo and reduces secondary bile acid abundance.**

311 **a**, In vivo study design. C57Bl/6J mice were orally gavaged with AAA-10 (30 mg/kg) once  
 312 daily for 5 days. Feces were collected daily and utilized to evaluate bile acid changes and BSH  
 313 activity. Mice were sacrificed on day 6 and tissues and blood were collected. **b**, AAA-10-treated  
 314 mice exhibited decreased BSH activity compared to vehicle-treated mice in fresh feces collected  
 315 on days 2 and 6. **c**, Percentages of the secondary bile acids deoxycholic acid (DCA) and  
 316 lithocholic acid (LCA) were reduced in cecal contents of mice treated with AAA-10. **d** and **e**,  
 317 Analysis of fecal bile acid contents over the period of the study showed that abundances of the  
 318 two secondary bile acids DCA and LCA were consistently decreased throughout the experiment.  
 319 For **b-e**, n=6 mice/group, two-tailed Welch's t test was performed. \*p<0.05, \*\*p<0.01,  
 320 \*\*\*p<0.001, \*\*\*\*p<0.0001, ns = not significant. All data are presented as mean ± s.e.m.

## 321 CONCLUSION

322 The studies reported herein were initiated with the goal of improving the potency of the  
323 first-generation gut-restricted inhibitor **AAA-2**. Structure-activity relationship studies that focused  
324 on incorporating the carbon scaffolds of different abundant bile acids into our inhibitor design led  
325 to the identification of a second-generation inhibitor, **AAA-10**. This compound exhibited increased  
326 potency in an array of in vitro assays compared to **AAA-2**. The structure of **AAA-10** is based on  
327 the core of LCA, a bile acid that contains a single hydroxyl group at C3. In previous work, we  
328 characterized the BSH activity of 20 abundant human gut Bacteroidetes species against glyco- and  
329 tauro-conjugated bile acids.<sup>20</sup> Glyco-lithocholic acid (GLCA) and tauro-lithocholic acid (TLCA)  
330 were effectively deconjugated (>90% conversion) by all BSH-containing Bacteroidetes species  
331 tested. In contrast, all other bile acids were incompletely deconjugated (<70%) by two or more of  
332 the species tested. Taken together, these results suggest that the LCA core may be effective as a  
333 scaffold for BSH inhibitors because it is recognized as a substrate by a range of gut bacteria. Future  
334 studies testing the deconjugating ability of a variety of Gram-positive and Gram-negative strains  
335 against a panel of conjugated bile acid substrates may further elucidate the substrate scope of gut  
336 bacterial BSHs and thus aid in next-generation inhibitor design.

337 **AAA-10** also exhibited an improved off-target effects profile compared to **AAA-1** and  
338 **AAA-2**. This compound inhibited BSH activity without inhibiting the growth of the Gram-  
339 negative and Gram-positive bacteria tested, did not activate or inhibit the host bile acid receptors  
340 FXR or TGR5 at concentrations expected to be effective in vivo, and was found to be non-toxic to  
341 intestinal and liver cells at higher concentrations than **AAA-1** and **AAA-2**.

342 Finally, we demonstrated that **AAA-10** inhibits BSH activity in vivo. Once-daily  
343 administration of **AAA-10** by gavage at a dose of 30 mg/kg resulted in significant BSH inhibition

344 in feces and a decrease in the abundance of the secondary bile acids DCA and LCA in feces and  
345 cecal contents. DCA and LCA are known to play crucial roles in host physiology. On the one hand,  
346 DCA and LCA are strongly associated with colon cancer development in patients, and evidence  
347 indicates that these compounds promote carcinogenesis in the colon and liver.<sup>13,14,38-40</sup> On the other  
348 hand, DCA has been shown to limit growth of the pathogen *Clostridium difficile*,<sup>41</sup> and recent work  
349 has shown that LCA induces the production of the anti-diabetic metabolite cholic acid-7-sulfate.<sup>35</sup>  
350 The ability to modulate the abundance of these compounds in vivo in fully colonized animals will  
351 facilitate investigations of the roles of these molecules in host physiology.

352         Looking ahead, it will be valuable to consider whether long-term use of BSH inhibitors in  
353 vivo affects microbial community composition. In addition, once-daily dosing via oral gavage may  
354 not be optimal in the case of ad libitum feeding, and further optimization of a strategy for inhibitor  
355 administration may be required. Nonetheless, our data indicate that we have developed a potent,  
356 non-toxic BSH inhibitor that modulates the in vivo bile acid pool, shifting the bile acid pool away  
357 from DCA and LCA. Importantly, we have shown that **AAA-10** exhibits in vivo efficacy using a  
358 daily dosing strategy in a 5 day experiment, a finding that paves the way for the use of **AAA-10** in  
359 longer-term animal models to elucidate how bile acids affect host health and either drive or  
360 ameliorate disease phenotypes. Because bile acids are absorbed and recirculated to the liver via  
361 the portal vein,<sup>5,42</sup> BSH inhibitors will facilitate investigations of how bile acids are causally  
362 involved in the initiation and progression of both liver and GI tract disorders, including  
363 inflammatory bowel diseases, non-alcoholic fatty liver disease (NAFLD), non-alcoholic  
364 steatohepatitis (NASH), liver cirrhosis, and liver and colon cancer.<sup>17,19</sup> Demonstration of  
365 prevention or amelioration of disease phenotypes in animals would suggest that BSHs could be  
366 targeted in a therapeutic context to treat human disease.

367

## 368 **METHODS**

369 Full details for all materials and methods are provided in the Supporting Information.

370

## 371 **ASSOCIATED CONTENT**

### 372 **Supporting Information**

373 Materials and methods (including detailed synthetic protocols and characterization data), Figures

374 S1-4, Table S1, Scheme S1.

## 375 **AUTHOR INFORMATION**

### 376 **Corresponding author**

377 \*Email: [sloan\\_devlin@hms.harvard.edu](mailto:sloan_devlin@hms.harvard.edu).

### 378 **Author Contributions**

379 A.A.A. and A.S.D. conceived the project and designed the experiments. A.A.A. performed the

380 synthesis and most of the experiments. D. R. and A.S.B. performed the in vivo BSH inhibition and

381 bile acid pool modulation study. S.N.C. performed the cell culture assays. C.E.P. performed the

382 experiments with Gram-negative bacteria. M.D.M. heterologously expressed and purified *B.*

383 *longum* recombinant BSH. A.A.A. and A.S.D. wrote the manuscript. All authors edited and

384 contributed to the review of the manuscript.

### 385 **Funding**

386 This research was supported National Institutes of Health (NIH) grant R35 GM128618 (A.S.D),

387 an Innovation Award from the Center for Microbiome Informatics and Therapeutics at MIT

388 (A.S.D), a grant from Harvard Digestive Diseases Center (supported by NIH grant

389 5P30DK034854-32) (A.S.D), a John and Virginia Kaneb Fellowship (A.S.D), a Quadrangle Fund

390 for the Advancement and Seeding of Translational Research at Harvard Medical School (Q-  
391 FASTR) grant (A.S.D), and an HMS Dean's Innovation Grant in the Basic and Social Sciences  
392 (A.S.D). S.N.C. acknowledges an American Heart Association Postdoctoral Fellowship. M.D.M.  
393 acknowledges an NSF Graduate Research Fellowship (DGE1745303).

#### 394 **Notes**

395 The authors declare the following competing financial interest(s): A. Sloan Devlin is an ad hoc  
396 consultant for Takeda Pharmaceuticals and HP Hood. The other authors declare that no competing  
397 interests exist.

398

#### 399 **ACKNOWLEDGEMENTS**

400 We are indebted to Stephen Blacklow, Nathanael Gray, David Scott, John M. Hatcher, Jinhua  
401 Wang, Jon Clardy, and members of the Devlin and Clardy groups for helpful discussions. We  
402 would like to acknowledge the Blacklow and Kruse labs for help with equipment and reagents.  
403 We thank K. Schoonjans (Ecole polytechnique fédérale de Lausanne-EPFL) for the FXR reporter  
404 plasmid and the ICCB-Longwood Screening Facility for use of their fluorescent plate reader. We  
405 thank the scientists at Bienta, Enamine for help with in vivo pharmacokinetics experimental design  
406 and execution.

407

408

#### 409 **REFERENCES**

- 410 1. Donia, M. S. & Fischbach, M. A. Small molecules from the human microbiota. *Science*  
411 **349**, 1254766 (2015).
- 412 2. Wallace, B. D. *et al.* Alleviating cancer drug toxicity by inhibiting a bacterial enzyme.  
413 *Science* **330**, 831–835 (2010).
- 414 3. Roberts, A. B. *et al.* Development of a gut microbe-targeted nonlethal therapeutic to  
415 inhibit thrombosis potential. *Nat. Med.* **24**, 1407–1417 (2018).

- 416 4. Maini Rekdal, V., Bess, E. N., Bisanz, J. E., Turnbaugh, P. J. & Balskus, E. P. Discovery  
417 and inhibition of an interspecies gut bacterial pathway for Levodopa metabolism. *Science*  
418 **364**, eaau6323 (2019).
- 419 5. Ridlon, J. M., Kang, D.-J. & Hylemon, P. B. Bile salt biotransformations by human  
420 intestinal bacteria. *J. Lipid Res.* **47**, 241–259 (2006).
- 421 6. Hofmann, A. F. The function of bile salts in fat absorption. The solvent properties of  
422 dilute micellar solutions of conjugated bile acids. *Biochem. J.* **89**, 57–68 (1963).
- 423 7. Roda, A., Hofmann, A. F. & Mysels, K. J. The influence of bile salt structure on self-  
424 association in aqueous solutions. *J. Biol. Chem.* **258**, 6362–6370 (1983).
- 425 8. Fiorucci, S. & Distrutti, E. Bile Acid-Activated Receptors, Intestinal Microbiota, and the  
426 Treatment of Metabolic Disorders. *Trends Mol Med* **21**, 702–714 (2015).
- 427 9. Schaap, F. G., Trauner, M. & Jansen, P. L. M. Bile acid receptors as targets for drug  
428 development. *Nat Rev Gastroenterol Hepatol* **11**, 55–67 (2014).
- 429 10. Pols, T. W. H. *et al.* Lithocholic acid controls adaptive immune responses by inhibition of  
430 Th1 activation through the Vitamin D receptor. *PLOS ONE* **12**, e0176715 (2017).
- 431 11. Hang, S. *et al.* Bile acid metabolites control TH17 and Treg cell differentiation. *Nature*  
432 **576**, 143–148 (2019).
- 433 12. Begley, M., Hill, C. & Gahan, C. G. M. Bile salt hydrolase activity in probiotics. *Appl.*  
434 *Environ. Microbiol.* **72**, 1729–1738 (2006).
- 435 13. Ridlon, J. M., Wolf, P. G. & Gaskins, H. R. Taurocholic acid metabolism by gut microbes  
436 and colon cancer. *Gut Microbes* **7**, 201–215 (2016).
- 437 14. Ma, C. *et al.* Gut microbiome-mediated bile acid metabolism regulates liver cancer via  
438 NKT cells. *Science* **360**, eaan5931 (2018).
- 439 15. Ajouz, H., Mukherji, D. & Shamseddine, A. Secondary bile acids: an underrecognized  
440 cause of colon cancer. *World J Surg Oncol* **12**, 164–5 (2014).
- 441 16. Ridlon, J. M., Harris, S. C., Bhowmik, S., Kang, D.-J. & Hylemon, P. B. Consequences of  
442 bile salt biotransformations by intestinal bacteria. *Gut Microbes* **7**, 22–39 (2016).
- 443 17. Song, Z. *et al.* Taxonomic profiling and populational patterns of bacterial bile salt  
444 hydrolase (BSH) genes based on worldwide human gut microbiome. *Microbiome* **7**, 9  
445 (2019).
- 446 18. Parasar, B. *et al.* Chemoproteomic Profiling of Gut Microbiota-Associated Bile Salt  
447 Hydrolase Activity. *ACS Cent Sci* **5**, 867–873 (2019).
- 448 19. Jia, B., Park, D., Hahn, Y. & Jeon, C. O. Metagenomic analysis of the human microbiome  
449 reveals the association between the abundance of gut bile salt hydrolases and host health.  
450 *Gut Microbes* **11**, 1300–1313 (2020).
- 451 20. Yao, L. *et al.* A selective gut bacterial bile salt hydrolase alters host metabolism. *eLife* **7**,  
452 675 (2018).
- 453 21. Joyce, S. A. *et al.* Regulation of host weight gain and lipid metabolism by bacterial bile  
454 acid modification in the gut. *Proc. Natl. Acad. Sci. U.S.A.* **111**, 7421–7426 (2014).
- 455 22. Li, F. *et al.* Microbiome remodelling leads to inhibition of intestinal farnesoid X receptor  
456 signalling and decreased obesity. *Nat Commun* **4**, 2384 (2013).
- 457 23. Xie, C. *et al.* An Intestinal Farnesoid X Receptor-Ceramide Signaling Axis Modulates  
458 Hepatic Gluconeogenesis in Mice. *Diabetes* **66**, 613–626 (2017).
- 459 24. Adhikari, A. A. *et al.* Development of a covalent inhibitor of gut bacterial bile salt  
460 hydrolases. *Nature Chemical Biology* **16**, 318–326 (2020).

- 461 25. Tanaka, H., Hashiba, H., Kok, J. & Mierau, I. Bile salt hydrolase of *Bifidobacterium*  
462 longum-biochemical and genetic characterization. *Appl. Environ. Microbiol.* **66**, 2502–  
463 2512 (2000).
- 464 26. Wang, Z. *et al.* Identification and Characterization of a Bile Salt Hydrolase from  
465 *Lactobacillus salivarius* for Development of Novel Alternatives to Antibiotic Growth  
466 Promoters. *Appl. Environ. Microbiol.* **78**, 8795–8802 (2012).
- 467 27. Strott, C. A. Sulfonation and molecular action. *Endocr Rev* **23**, 703–732 (2002).
- 468 28. Alnouti, Y. Bile Acid sulfation: a pathway of bile acid elimination and detoxification.  
469 *Toxicol. Sci.* **108**, 225–246 (2009).
- 470 29. Palmer, J. T. & Inc, P. Process for forming a fluoromethyl ketone. (1994).
- 471 30. Zheng, X. *et al.* Bile acid is a significant host factor shaping the gut microbiome of diet-  
472 induced obese mice. *BMC Biol* **15**, 120–15 (2017).
- 473 31. Sayin, S. I. *et al.* Gut microbiota regulates bile acid metabolism by reducing the levels of  
474 tauro-beta-muricholic acid, a naturally occurring FXR antagonist. *Cell Metab.* **17**, 225–  
475 235 (2013).
- 476 32. Perez, M.-J. & Briz, O. Bile-acid-induced cell injury and protection. *World J.*  
477 *Gastroenterol.* **15**, 1677–1689 (2009).
- 478 33. Glinghammar, B., Inoue, H. & Rafter, J. J. Deoxycholic acid causes DNA damage in  
479 colonic cells with subsequent induction of caspases, COX-2 promoter activity and the  
480 transcription factors NF-kB and AP-1. *Carcinogenesis* **23**, 839–845 (2002).
- 481 34. Ferruzza, S., Rossi, C., Scarino, M. L. & Sambuy, Y. A protocol for differentiation of  
482 human intestinal Caco-2 cells in asymmetric serum-containing medium. *Toxicol In Vitro*  
483 **26**, 1252–1255 (2012).
- 484 35. Chaudhari, S. N. *et al.* A microbial metabolite remodels the gut-liver axis following  
485 bariatric surgery. *Cell Host & Microbe* **317**, 571 (2020).
- 486 36. Wahlström, A., Sayin, S. I., Marschall, H.-U. & Bäckhed, F. Intestinal Crosstalk between  
487 Bile Acids and Microbiota and Its Impact on Host Metabolism. *Cell Metab.* **24**, 41–50  
488 (2016).
- 489 37. Ellacott, K. L. J., Morton, G. J., Woods, S. C., Tso, P. & Schwartz, M. W. Assessment of  
490 feeding behavior in laboratory mice. *Cell Metab.* **12**, 10–17 (2010).
- 491 38. Reddy, B. S., Narasawa, T., Weisburger, J. H. & Wynder, E. L. Promoting effect of  
492 sodium deoxycholate on colon adenocarcinomas in germfree rats. *J. Natl. Cancer Inst.* **56**,  
493 441–442 (1976).
- 494 39. Narisawa, T., Magadia, N. E., Weisburger, J. H. & Wynder, E. L. Promoting effect of bile  
495 acids on colon carcinogenesis after intrarectal instillation of N-methyl-N'-nitro-N-  
496 nitrosoguanidine in rats. *J. Natl. Cancer Inst.* **53**, 1093–1097 (1974).
- 497 40. Yoshimoto, S. *et al.* Obesity-induced gut microbial metabolite promotes liver cancer  
498 through senescence secretome. *Nature* **499**, 97–101 (2013).
- 499 41. Buffie, C. G. *et al.* Precision microbiome reconstitution restores bile acid mediated  
500 resistance to *Clostridium difficile*. *Nature* **517**, 205–208 (2015).
- 501 42. van de Peppel, I. P., Verkade, H. J. & Jonker, J. W. Metabolic consequences of ileal  
502 interruption of the enterohepatic circulation of bile acids. *Am. J. Physiol. Gastrointest.*  
503 *Liver Physiol.* **319**, G619–G625 (2020).
- 504

- 506 1. Donia, M. S. & Fischbach, M. A. Small molecules from the human microbiota. *Science*  
507 **349**, 1254766 (2015).
- 508 2. Wallace, B. D. *et al.* Alleviating cancer drug toxicity by inhibiting a bacterial enzyme.  
509 *Science* **330**, 831–835 (2010).
- 510 3. Roberts, A. B. *et al.* Development of a gut microbe-targeted nonlethal therapeutic to  
511 inhibit thrombosis potential. *Nat. Med.* **24**, 1407–1417 (2018).
- 512 4. Maini Rekdal, V., Bess, E. N., Bisanz, J. E., Turnbaugh, P. J. & Balskus, E. P. Discovery  
513 and inhibition of an interspecies gut bacterial pathway for Levodopa metabolism. *Science*  
514 **364**, eaau6323 (2019).
- 515 5. Ridlon, J. M., Kang, D.-J. & Hylemon, P. B. Bile salt biotransformations by human  
516 intestinal bacteria. *J. Lipid Res.* **47**, 241–259 (2006).
- 517 6. Hofmann, A. F. The function of bile salts in fat absorption. The solvent properties of  
518 dilute micellar solutions of conjugated bile acids. *Biochem. J.* **89**, 57–68 (1963).
- 519 7. Roda, A., Hofmann, A. F. & Mysels, K. J. The influence of bile salt structure on self-  
520 association in aqueous solutions. *J. Biol. Chem.* **258**, 6362–6370 (1983).
- 521 8. Fiorucci, S. & Distrutti, E. Bile Acid-Activated Receptors, Intestinal Microbiota, and the  
522 Treatment of Metabolic Disorders. *Trends Mol Med* **21**, 702–714 (2015).
- 523 9. Schaap, F. G., Trauner, M. & Jansen, P. L. M. Bile acid receptors as targets for drug  
524 development. *Nat Rev Gastroenterol Hepatol* **11**, 55–67 (2014).
- 525 10. Pols, T. W. H. *et al.* Lithocholic acid controls adaptive immune responses by inhibition of  
526 Th1 activation through the Vitamin D receptor. *PLOS ONE* **12**, e0176715 (2017).
- 527 11. Hang, S. *et al.* Bile acid metabolites control TH17 and Treg cell differentiation. *Nature*  
528 **576**, 143–148 (2019).
- 529 12. Begley, M., Hill, C. & Gahan, C. G. M. Bile salt hydrolase activity in probiotics. *Appl.*  
530 *Environ. Microbiol.* **72**, 1729–1738 (2006).
- 531 13. Ridlon, J. M., Wolf, P. G. & Gaskins, H. R. Taurocholic acid metabolism by gut microbes  
532 and colon cancer. *Gut Microbes* **7**, 201–215 (2016).
- 533 14. Ma, C. *et al.* Gut microbiome-mediated bile acid metabolism regulates liver cancer via  
534 NKT cells. *Science* **360**, eaan5931 (2018).
- 535 15. Ajouz, H., Mukherji, D. & Shamseddine, A. Secondary bile acids: an underrecognized  
536 cause of colon cancer. *World J Surg Oncol* **12**, 164–5 (2014).
- 537 16. Ridlon, J. M., Harris, S. C., Bhowmik, S., Kang, D.-J. & Hylemon, P. B. Consequences of  
538 bile salt biotransformations by intestinal bacteria. *Gut Microbes* **7**, 22–39 (2016).
- 539 17. Song, Z. *et al.* Taxonomic profiling and populational patterns of bacterial bile salt  
540 hydrolase (BSH) genes based on worldwide human gut microbiome. *Microbiome* **7**, 9  
541 (2019).
- 542 18. Parasar, B. *et al.* Chemoproteomic Profiling of Gut Microbiota-Associated Bile Salt  
543 Hydrolase Activity. *ACS Cent Sci* **5**, 867–873 (2019).
- 544 19. Jia, B., Park, D., Hahn, Y. & Jeon, C. O. Metagenomic analysis of the human microbiome  
545 reveals the association between the abundance of gut bile salt hydrolases and host health.  
546 *Gut Microbes* **11**, 1300–1313 (2020).
- 547 20. Yao, L. *et al.* A selective gut bacterial bile salt hydrolase alters host metabolism. *eLife* **7**,  
548 675 (2018).
- 549 21. Joyce, S. A. *et al.* Regulation of host weight gain and lipid metabolism by bacterial bile  
550 acid modification in the gut. *Proc. Natl. Acad. Sci. U.S.A.* **111**, 7421–7426 (2014).



- 551 22. Li, F. *et al.* Microbiome remodelling leads to inhibition of intestinal farnesoid X receptor  
552 signalling and decreased obesity. *Nat Commun* **4**, 2384 (2013).
- 553 23. Xie, C. *et al.* An Intestinal Farnesoid X Receptor-Ceramide Signaling Axis Modulates  
554 Hepatic Gluconeogenesis in Mice. *Diabetes* **66**, 613–626 (2017).
- 555 24. Adhikari, A. A. *et al.* Development of a covalent inhibitor of gut bacterial bile salt  
556 hydrolases. *Nature Chemical Biology* **16**, 318–326 (2020).
- 557 25. Tanaka, H., Hashiba, H., Kok, J. & Mierau, I. Bile salt hydrolase of *Bifidobacterium*  
558 *longum*-biochemical and genetic characterization. *Appl. Environ. Microbiol.* **66**, 2502–  
559 2512 (2000).
- 560 26. Wang, Z. *et al.* Identification and Characterization of a Bile Salt Hydrolase from  
561 *Lactobacillus salivarius* for Development of Novel Alternatives to Antibiotic Growth  
562 Promoters. *Appl. Environ. Microbiol.* **78**, 8795–8802 (2012).
- 563 27. Strott, C. A. Sulfonation and molecular action. *Endocr Rev* **23**, 703–732 (2002).
- 564 28. Alnouti, Y. Bile Acid sulfation: a pathway of bile acid elimination and detoxification.  
565 *Toxicol. Sci.* **108**, 225–246 (2009).
- 566 29. Palmer, J. T. & Inc, P. Process for forming a fluoromethyl ketone. (1994).
- 567 30. Zheng, X. *et al.* Bile acid is a significant host factor shaping the gut microbiome of diet-  
568 induced obese mice. *BMC Biol* **15**, 120–15 (2017).
- 569 31. Sayin, S. I. *et al.* Gut microbiota regulates bile acid metabolism by reducing the levels of  
570 tauro-beta-muricholic acid, a naturally occurring FXR antagonist. *Cell Metab.* **17**, 225–  
571 235 (2013).
- 572 32. Perez, M.-J. & Briz, O. Bile-acid-induced cell injury and protection. *World J.*  
573 *Gastroenterol.* **15**, 1677–1689 (2009).
- 574 33. Glinghammar, B., Inoue, H. & Rafter, J. J. Deoxycholic acid causes DNA damage in  
575 colonic cells with subsequent induction of caspases, COX-2 promoter activity and the  
576 transcription factors NF-kB and AP-1. *Carcinogenesis* **23**, 839–845 (2002).
- 577 34. Ferruzza, S., Rossi, C., Scarino, M. L. & Sambuy, Y. A protocol for differentiation of  
578 human intestinal Caco-2 cells in asymmetric serum-containing medium. *Toxicol In Vitro*  
579 **26**, 1252–1255 (2012).
- 580 35. Chaudhari, S. N. *et al.* A microbial metabolite remodels the gut-liver axis following  
581 bariatric surgery. *Cell Host & Microbe* **317**, 571 (2020).
- 582 36. Wahlström, A., Sayin, S. I., Marschall, H.-U. & Bäckhed, F. Intestinal Crosstalk between  
583 Bile Acids and Microbiota and Its Impact on Host Metabolism. *Cell Metab.* **24**, 41–50  
584 (2016).
- 585 37. Ellacott, K. L. J., Morton, G. J., Woods, S. C., Tso, P. & Schwartz, M. W. Assessment of  
586 feeding behavior in laboratory mice. *Cell Metab.* **12**, 10–17 (2010).
- 587 38. Reddy, B. S., Narasawa, T., Weisburger, J. H. & Wynder, E. L. Promoting effect of  
588 sodium deoxycholate on colon adenocarcinomas in germfree rats. *J. Natl. Cancer Inst.* **56**,  
589 441–442 (1976).
- 590 39. Narisawa, T., Magadia, N. E., Weisburger, J. H. & Wynder, E. L. Promoting effect of bile  
591 acids on colon carcinogenesis after intrarectal instillation of N-methyl-N'-nitro-N-  
592 nitrosoguanidine in rats. *J. Natl. Cancer Inst.* **53**, 1093–1097 (1974).
- 593 40. Yoshimoto, S. *et al.* Obesity-induced gut microbial metabolite promotes liver cancer  
594 through senescence secretome. *Nature* **499**, 97–101 (2013).
- 595 41. Buffie, C. G. *et al.* Precision microbiome reconstitution restores bile acid mediated  
596 resistance to *Clostridium difficile*. *Nature* **517**, 205–208 (2015).

- 597 42. van de Peppel, I. P., Verkade, H. J. & Jonker, J. W. Metabolic consequences of ileal  
598 interruption of the enterohepatic circulation of bile acids. *Am. J. Physiol. Gastrointest.*  
599 *Liver Physiol.* **319**, G619–G625 (2020).  
600
